# Supplementary material for: Cobalt complexes of BODIPY as precatalyst for the photooxidation of water and DHN
Source: Royal Society of Chemistry journal article supplement (doi:10.1039/c4ra08940e), 2014-01-01
Supplement: c4ra08940e1.pdf [file c4ra08940e1.pdf]

## Supporting materials

# Cobalt complexes of BODIPY as precatalyst for the photooxidation of water and DHN

Qiu-Yun Chen<sup>a,b\*</sup>, Meng-Yun Kong<sup>a</sup>, Pei-Dong Wang<sup>a</sup>, Su-Ci Meng<sup>a</sup>, Xiao-Lei Xu<sup>a</sup>

<sup>a</sup>School of chemistry and chemical engineering, Jiangsu University, Zhenjiang, 212013, P.R.China. Tel.: +86 0511 8879800; Fax: +86 0511 88791602; \* Corresponding author: E-mail address: [chengy@ujs.edu.cn](mailto:chengy@ujs.edu.cn) (Q.Y. Chen)

<sup>b</sup>State key Laboratory of Coordination Chemistry, Nanjing University, 210093, P.R.China

Fig.S1 to Fig. S6

Table S1

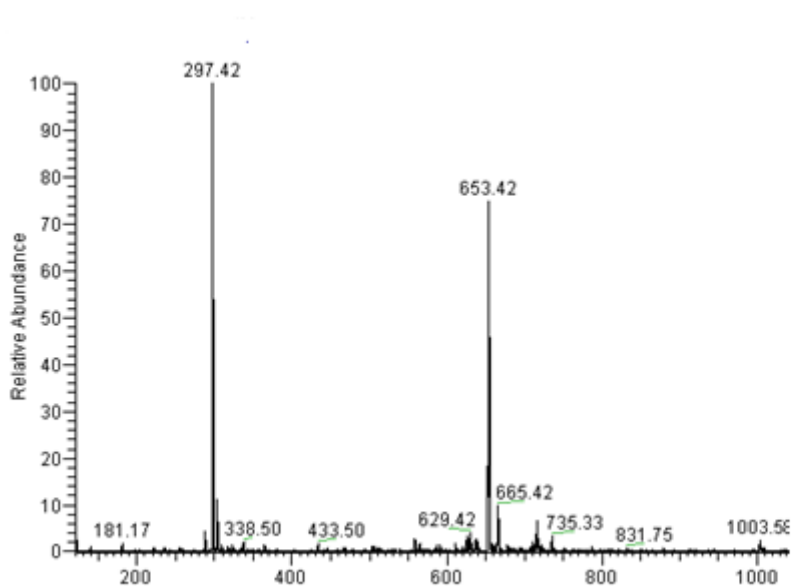

**Fig. S1a** The ESI-MS spectrum of  $[(m\text{-BDA})\text{CoCl}_2] \cdot \text{H}_2\text{O}$  (Co1) in MeCN. The main peak for Co1 at  $m/z$  (%) = 297.42 (100) corresponds to species  $[(m\text{-BDA})\text{Co}]^{2+}$ , The 653.42 (76) is attributed to the  $[(m\text{-BDA})\text{Co} + \text{CH}_3\text{CN} + \text{H}_2\text{O}]^+$ .

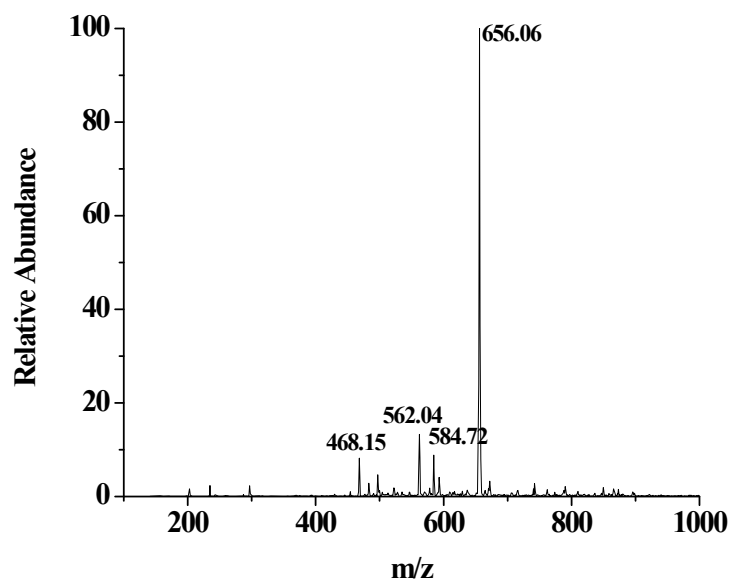

**Fig. S1b** The ESI-MS spectrum of (Co2) in MeCN. The main peak at  $m/z$  (%) = 656.06 (100) corresponds to the species  $[(m\text{-BDA-e})\text{Co}+\text{CH}_3\text{CN}+\text{H}_2\text{O}]^+$ .

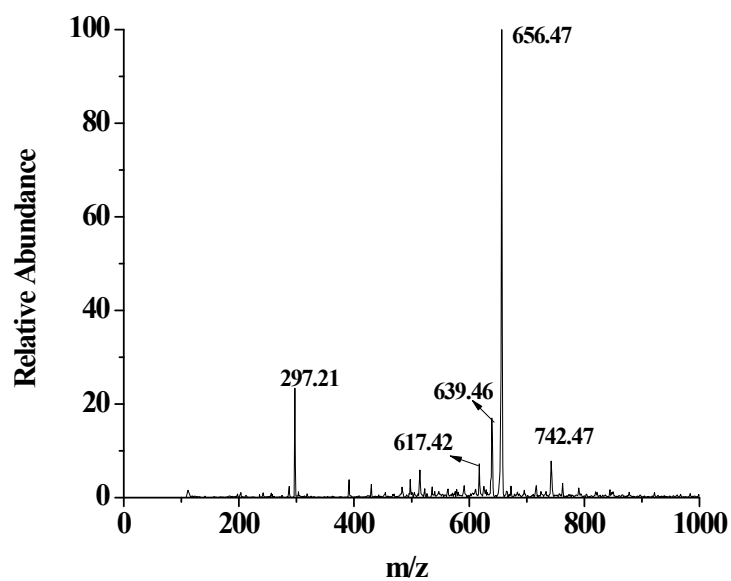

**Fig. S1c** ES-MS spectrum for Co2 in MeCN-H<sub>2</sub>O reaction system. The peaks at  $m/z$  (%) = 656.47 (100) and  $m/z=297.21$ , (30%) corresponds to the species  $[(m\text{-BDA})\text{Co}+\text{NO}-3]^+$  and  $[(m\text{-BDA})\text{Co}]^{2+}$ , respectively.

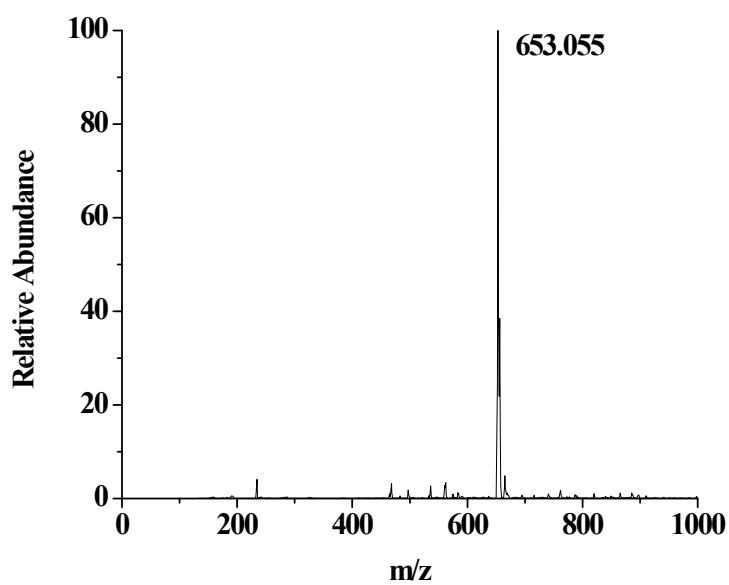

**Fig.S1d** The ESI-MS spectrum of (**Co3**) in MeCN. The peaks at  $m/z$  (%) = 653.055 (100) corresponds to the species  $[(p\text{-BDA-e)Co}+\text{CH}_3\text{CN}+\text{H}_2\text{O}]^+$

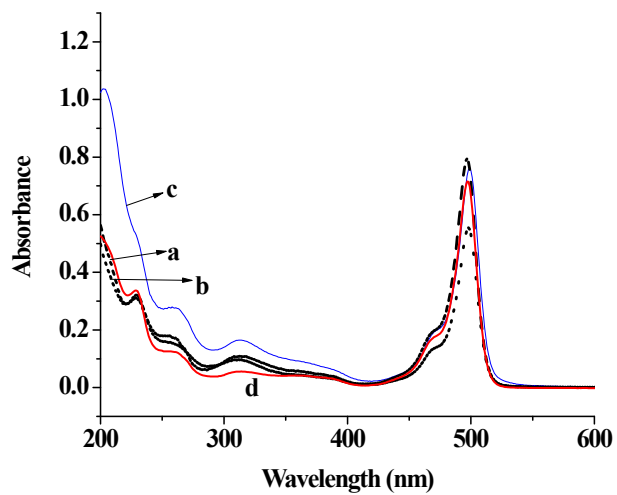

**Fig.S2** The UV-Vis absorption Spectra of *m*-BDA (a), Co1 (b), Co2 (c), Co3 (d) (10 $\mu$ M) in CH<sub>3</sub>CN solution.

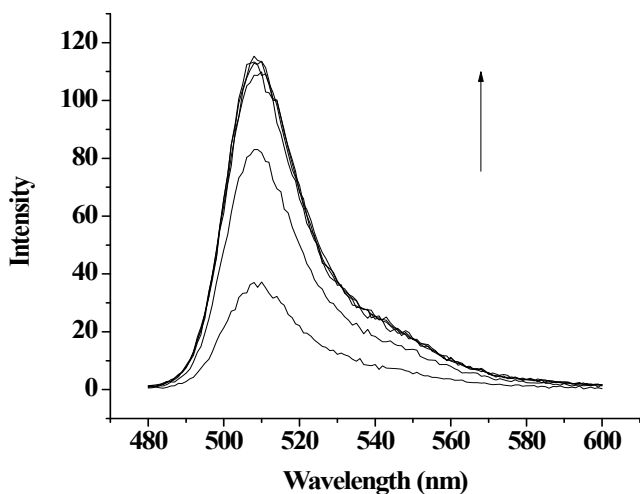

Fig.S3 Fluorescence changes of Co2 (1  $\mu$ M, 3mL, MeCN) with the addition of H<sub>2</sub>O ( $V_{\text{H}_2\text{O}}:V_{\text{CH}_3\text{CN}} = 1/600-1/120$ ). The excitation wavelength was 460 nm.

Table S1 Fluorescence quantum yield of Cobalt(III) complexes

|       | CH <sub>3</sub> CN | CH <sub>3</sub> CN-H <sub>2</sub> O* | CH <sub>3</sub> CN-MeOH* | CH <sub>3</sub> CN-CH <sub>3</sub> CH <sub>2</sub> OH* |
|-------|--------------------|--------------------------------------|--------------------------|--------------------------------------------------------|
| Co1   | 0.390              | 0.391                                | 0.357                    | 0.412                                                  |
| Co2   | 0.0728             | 0.615                                | 0.234                    | 0.402                                                  |
| Co3   | 0.0653             | 0.376                                | 0.429                    | 0.325                                                  |
| m-DBA | -                  | 0.610                                | -                        | -                                                      |
| P-BDA | -                  | 0.439                                | -                        | -                                                      |

\* The volume ratio of CH<sub>3</sub>CN-L\* is 6:1 (L= H<sub>2</sub>O, CH<sub>3</sub>OH, CH<sub>3</sub>CH<sub>2</sub>OH).

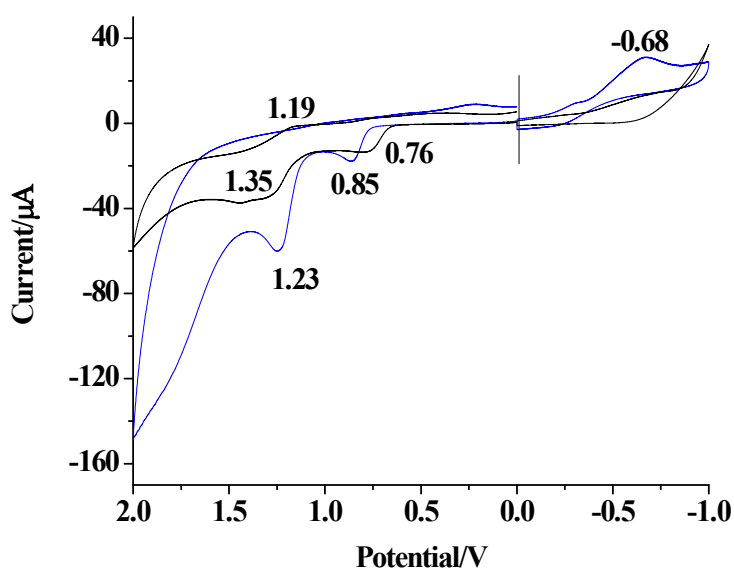

Fig.S4a Cyclic voltammograms of Co1 (1 mM) in 0.1 M TBAP in MeCN (black line) and in MeCN:H<sub>2</sub>O = 1:1,

v/v ) (blue line).

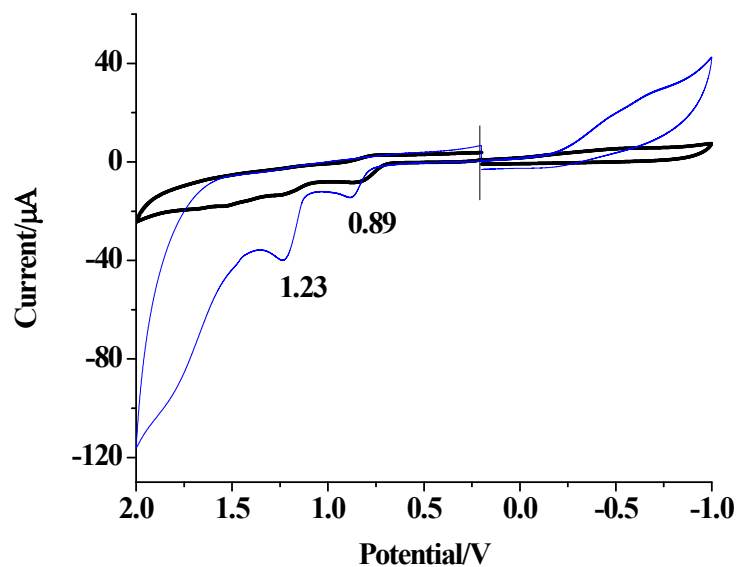

**Fig.S4b** Cyclic voltammograms of Co<sup>3+</sup> (1 mM) in 0.1 M TBAP in MeCN (black line) and in MeCN:H<sub>2</sub>O = 1:1, v/v ) (blue line).

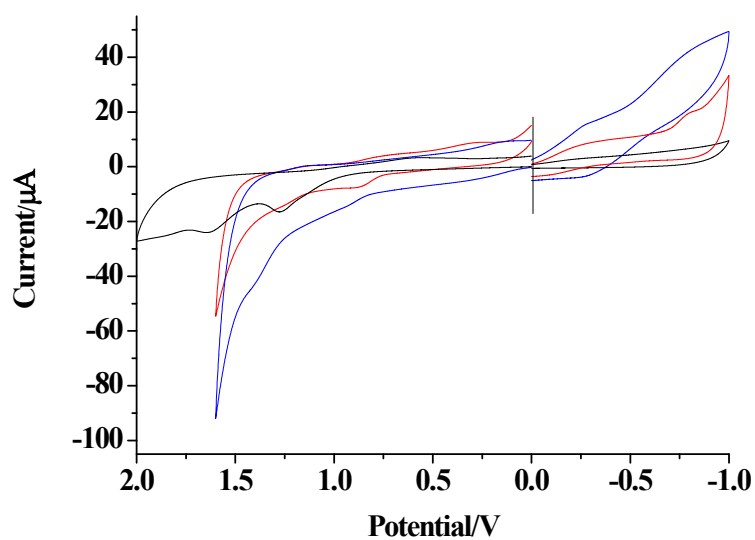

**Fig. 4c** Cyclic voltammograms of Co(NO<sub>3</sub>)<sub>2</sub> · 6H<sub>2</sub>O (1 mM) in 0.1 M TBAP in MeCN (black line) and in MeCN:PB ( pH=7.2, 20 mM) = 6:1, v/v (red line) and irradiated by blue LED light (10W) in MeCN:PB ( pH=7.2, 20 mM)=6:1, v/v (blue line)

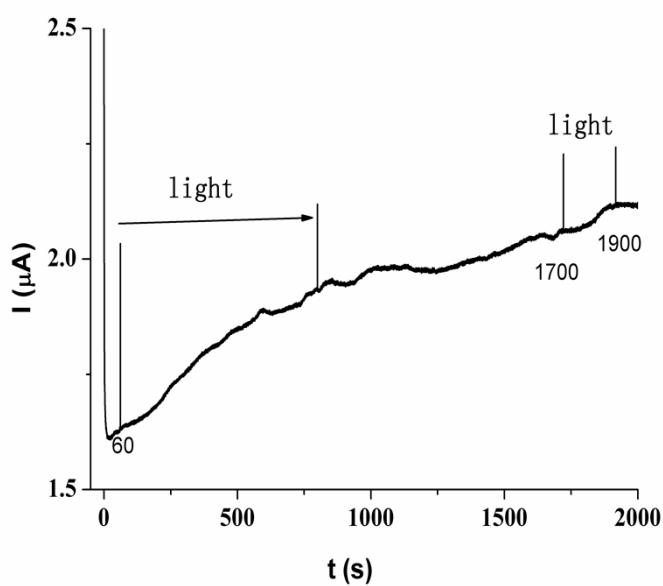

Fig. 4d Catalytic current profile at  $E=1.2$  V in MeCN-PB (6:1, pH 8.5) for  $\text{Co}_2$  coated FTO working electrode, 0-60 s, visible light; 60-800 s, green LED light (4W); 801-1699 s, visible light; 1700-1900 s, green LED light.

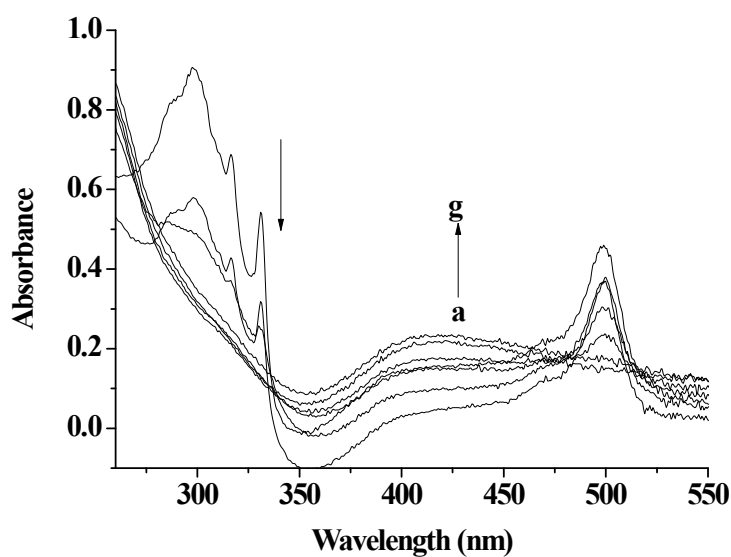

Fig. S5a UV-vis absorption spectral change for the photooxidation of DHN ( $1.0 \times 10^{-4} \text{M}$ ) using  $\text{Co}_2$  ( $5 \times 10^{-6} \text{M}$ ) as the photo-sensitizer in  $\text{CH}_3\text{CN}-\text{D}_2\text{O}$  (v:v =6:1) solution. a-g= 0, 0.5, 1, 2, 3, 4, 5 h). Irradiation with blue LED light (440-480 nm,  $4 \text{ W cm}^{-2}$ ).

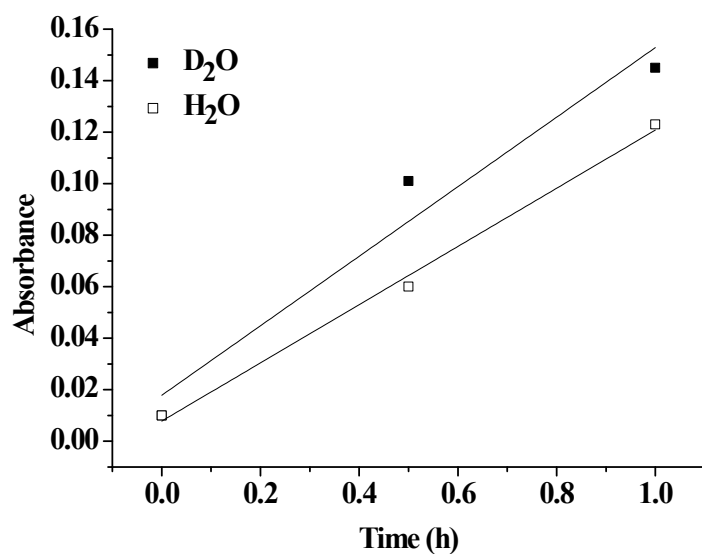

**Fig. S5b** UV-vis absorption at 427 nm in CH<sub>3</sub>CN-H<sub>2</sub>O (6:1) system and CH<sub>3</sub>CN-D<sub>2</sub>O (6:1) system, respectively, in 0-1 h.

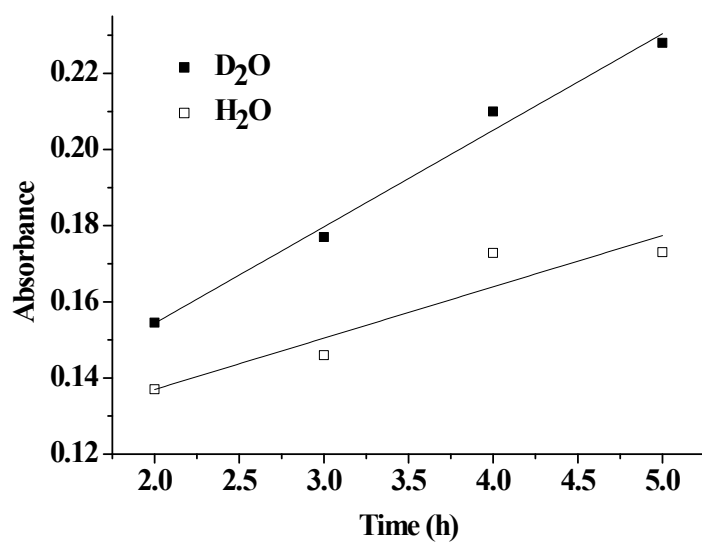

**Fig. S5c** UV-vis absorption at 427 nm in CH<sub>3</sub>CN-H<sub>2</sub>O (6:1) system and CH<sub>3</sub>CN-D<sub>2</sub>O (6:1) system, respectively, in 2-5 h.

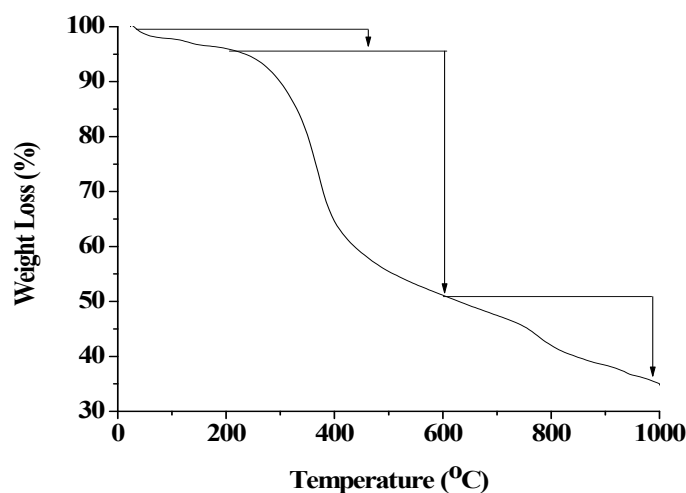

**Fig. S6a** The thermal analysis (TG) curve of  $[(m\text{-BDA})\text{CoCl}_2]\cdot\text{H}_2\text{O}$  (Co1). The weight loss of 2.17% (calcd 2.32%) at 20-100°C for Co1 is attributed to the loss of one water. The 47.38% weight loss in the range of 100-600°C corresponds to the loss of N-benzyl di(pyridylmethyl)amine groups from m-BDA and one chlorine ions in Co1 (calcd 47.51%). Thermal analysis results confirm the formation of  $[(m\text{-BDA})\text{CoCl}_2]\cdot\text{H}_2\text{O}$

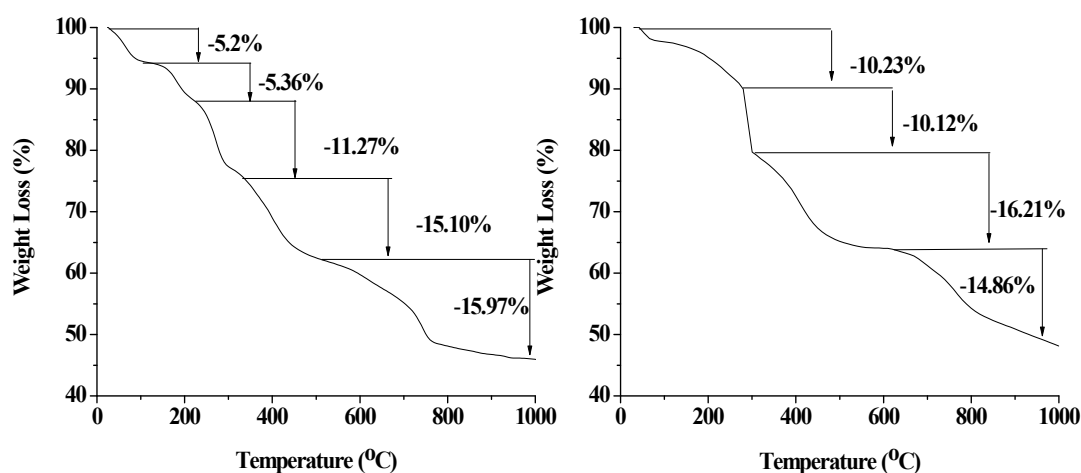

**Fig. S6b** The thermal analysis (TG) curve of Co2 (left) and Co3 (right). The weight loss of 5.20% (calcd 4.52%) at 20-100°C for Co2 is attributed to the loss of two water molecules. The weight loss of 5.95% in 100-200 °C corresponds to the loss of one  $\text{CH}_3\text{CN}$  molecule (5.21%). The weight losses of 11.27% in 200-300°C, 15.10% in 300-520°C, and 15.72% in 520-1000 °C correspond to the loss of Py- $\text{CH}_2$ , Py- $\text{CH}_2\text{-N-CH}_2$ , and two  $-\text{CH}_2$  groups, one F atom and the phenyl group from the m-BDA, respectively. Thermal analysis results confirm the formation of  $[(m\text{-BDA})\text{Co}(\text{NO}_3)_2](\text{H}_2\text{O})_2\cdot\text{CH}_3\text{CN}$  (Co2). The weight loss of 10.23% (calcd 11.16%) at 20-278 °C for Co3 is attributed to the loss of one pyridyl group. The weight loss of 10.12% in 278-298 °C corresponds to the loss of another pyridyl group (calcd 11.16%). The weight losses of 16.21% (calcd. 16.43%) in 298-632°C, correspond to the loss of  $\text{N}(\text{CH}_2)_3$ -from the m-BDA and a coordinated  $\text{NO}_3^-$  respectively, and 14.86% weight loss in 632-800 °C corresponds to the loss of two  $\text{NO}_3^-$  groups. Thermal analysis results confirm the existence of  $[(p\text{-BDA})\text{Co}(\text{NO}_3)_2]$  (Co3).
